# Supplementary material for: Validation of a Rapid Visual Screening of Campylobacter jejuni in Chicken Using Antibody-Conjugated Fluorescent Dye-Doped Silica Nanoparticle Reporters
Source: Hindawi journal article supplement (doi:10.1155/2018/4571345), 2018-08-14
Supplement: f1 [file 4571345.f1.pdf]

Supplementary Material for

Relative LOD the FDS-NPs Test Kit (n=6)

**Table 5** LOD of the antibody-conjugated FDS-NPs assay

|                                   | Concentration of <i>C. jejuni</i> ATCC 33560 (cfu/ml) |                 |                 |                 |                 |                 |                 | <u>10<sup>7</sup></u> |
|-----------------------------------|-------------------------------------------------------|-----------------|-----------------|-----------------|-----------------|-----------------|-----------------|-----------------------|
|                                   | 10 <sup>0</sup>                                       | 10 <sup>1</sup> | 10 <sup>2</sup> | 10 <sup>3</sup> | 10 <sup>4</sup> | 10 <sup>5</sup> | 10 <sup>6</sup> |                       |
| Direct cultural/PCR assay         | -                                                     | +               | +               | +               | +               | +               | +               | +                     |
| Antibody-conjugated FDS-NPs assay | -                                                     | -               | -               | +               | +               | +               | +               | +                     |

Supplementary Material for

Inclusive and Exclusive Testing

**Table 6** Testing of inclusive strain using antibody-conjugated FDS-NPs assay (50 strains of *C. jejuni*)

| Organism                    | Results          |                                                |                                                         |
|-----------------------------|------------------|------------------------------------------------|---------------------------------------------------------|
|                             | Expected results | (Actual results)                               |                                                         |
|                             |                  | Reference method:<br>Direct cultural/PCR assay | Alternative method:<br>Antibodyconjugated FDS-NPs assay |
| Inclusive-target strains    |                  |                                                |                                                         |
| <i>C. jejuni</i> ATCC 33291 | +                | +                                              | +                                                       |
| <i>C. jejuni</i> ATCC 33560 | +                | +                                              | +                                                       |
| <i>C. jejuni</i> ATCC 81176 | +                | +                                              | +                                                       |
| <i>C. jejuni</i> A01        | +                | +                                              | +                                                       |
| <i>C. jejuni</i> A02        | +                | +                                              | +                                                       |
| <i>C. jejuni</i> A03        | +                | +                                              | +                                                       |
| <i>C. jejuni</i> A04        | +                | +                                              | +                                                       |
| <i>C. jejuni</i> A05        | +                | +                                              | +                                                       |
| <i>C. jejuni</i> A06        | +                | +                                              | +                                                       |
| <i>C. jejuni</i> A07        | +                | +                                              | +                                                       |
| <i>C. jejuni</i> A08        | +                | +                                              | +                                                       |
| <i>C. jejuni</i> A09        | +                | +                                              | +                                                       |
| <i>C. jejuni</i> A10        | +                | +                                              | +                                                       |
| <i>C. jejuni</i> A11        | +                | +                                              | +                                                       |
| <i>C. jejuni</i> A12        | +                | +                                              | +                                                       |
| <i>C. jejuni</i> A13        | +                | +                                              | +                                                       |
| <i>C. jejuni</i> A14        | +                | +                                              | +                                                       |
| <i>C. jejuni</i> A15        | +                | +                                              | +                                                       |
| <i>C. jejuni</i> A16        | +                | +                                              | +                                                       |
| <i>C. jejuni</i> A17        | +                | +                                              | +                                                       |
| <i>C. jejuni</i> A18        | +                | +                                              | +                                                       |
| <i>C. jejuni</i> A19        | +                | +                                              | +                                                       |
| <i>C. jejuni</i> A20        | +                | +                                              | +                                                       |
| <i>C. jejuni</i> A21        | +                | +                                              | +                                                       |

| <i>C. jejuni</i> A22                        | +                | +                                                 | +                                                              |
|---------------------------------------------|------------------|---------------------------------------------------|----------------------------------------------------------------|
| Organism                                    | Expected results | Results                                           |                                                                |
|                                             |                  | (Actual results)                                  |                                                                |
|                                             |                  | Reference method:<br>Direct cultural/PCR<br>assay | Alternative method:<br>Antibodyconjugated<br>FDS-<br>NPs assay |
| <b>Inclusive-target strains<br/>(Cont.)</b> |                  |                                                   |                                                                |
| <i>C. jejuni</i> A23                        | +                | +                                                 | +                                                              |
| <i>C. jejuni</i> A24                        | +                | +                                                 | +                                                              |
| <i>C. jejuni</i> A25                        | +                | +                                                 | +                                                              |
| <i>C. jejuni</i> A26                        | +                | +                                                 | +                                                              |
| <i>C. jejuni</i> A27                        | +                | +                                                 | +                                                              |
| <i>C. jejuni</i> A28                        | +                | +                                                 | +                                                              |
| <i>C. jejuni</i> A29                        | +                | +                                                 | +                                                              |
| <i>C. jejuni</i> A30                        | +                | +                                                 | +                                                              |
| <i>C. jejuni</i> A31                        | +                | +                                                 | +                                                              |
| <i>C. jejuni</i> A32                        | +                | +                                                 | +                                                              |
| <i>C. jejuni</i> A33                        | +                | +                                                 | +                                                              |
| <i>C. jejuni</i> A34                        | +                | +                                                 | +                                                              |
| <i>C. jejuni</i> A35                        | +                | +                                                 | +                                                              |
| <i>C. jejuni</i> A36                        | +                | +                                                 | +                                                              |
| <i>C. jejuni</i> A37                        | +                | +                                                 | +                                                              |
| <i>C. jejuni</i> A38                        | +                | +                                                 | +                                                              |
| <i>C. jejuni</i> A39                        | +                | +                                                 | +                                                              |
| <i>C. jejuni</i> A40                        | +                | +                                                 | +                                                              |
| <i>C. jejuni</i> A41                        | +                | +                                                 | +                                                              |
| <i>C. jejuni</i> A42                        | +                | +                                                 | +                                                              |
| <i>C. jejuni</i> A43                        | +                | +                                                 | +                                                              |
| <i>C. jejuni</i> A44                        | +                | +                                                 | +                                                              |
| <i>C. jejuni</i> A45                        | +                | +                                                 | +                                                              |
| <i>C. jejuni</i> A46                        | +                | +                                                 | +                                                              |
| <i>C. jejuni</i> A47                        | +                | +                                                 | +                                                              |

**Table 7** Testing of exclusive strain using antibody-conjugated FDS-NPs assay (30 strains)

| Test organism                   | Results          |                                                   |                                                                |
|---------------------------------|------------------|---------------------------------------------------|----------------------------------------------------------------|
|                                 | Actual results   |                                                   |                                                                |
|                                 | Expected results | Reference method:<br>Direct cultural/PCR<br>assay | Alternative method:<br>Antibodyconjugated<br>FDS-<br>NPs assay |
| <b>Exclusive-target strains</b> |                  |                                                   |                                                                |
| <i>Bacillus megaterium</i>      | -                | -                                                 | -                                                              |

|                                             |   |   |   |
|---------------------------------------------|---|---|---|
| <i>Citrobacter freundii</i>                 | - | - | - |
| <i>Klebsiella pneumonia</i>                 | - | - | - |
| <i>Proteus vulgaris</i>                     | - | - | - |
| <i>Pseudomonas aeruginosa</i>               | - | - | - |
| <i>Shigella flexneri</i>                    | - | - | - |
| <i>Vibrio cholera</i>                       | - | - | - |
| <i>Salmonella</i> Typhimurium<br>(DMST 562) | - | - | - |
| <i>Shigella flexneri</i>                    | - | - | - |
| <i>E. coli</i> viscera A 01                 | - | - | - |
| <i>E. coli</i> viscera A 02                 | - | - | - |
| <i>E. coli</i> viscera A 03                 | - | - | - |
| <i>E. coli</i> viscera A 04                 | - | - | - |
| <i>E. coli</i> viscera A 05                 | - | - | - |
| <i>E. coli</i> viscera B 01                 | - | - | - |
| <i>E. coli</i> viscera B 02                 | - | - | - |
| <i>E. coli</i> viscera B 03                 | - | - | - |
| <i>E. coli</i> viscera B 04                 | - | - | - |
| <i>E. coli</i> viscera B 05                 | - | - | - |
| <i>Salmonella</i> spp. A 01                 | - | - | - |
| <i>Salmonella</i> spp. A 02                 | - | - | - |
| <i>Salmonella</i> spp. A 03                 | - | - | - |
| <i>Salmonella</i> spp. A 04                 | - | - | - |
| <i>Salmonella</i> spp. A 05                 | - | - | - |
| <i>Salmonella</i> spp. A 06                 | - | - | - |
| <i>Salmonella</i> spp. A 07                 | - | - | - |
| <i>Salmonella</i> spp. A 08                 | - | - | - |
| <i>Salmonella</i> spp. A 09                 | - | - | - |
| <i>Salmonella</i> spp. A 10                 | - | - | - |
| <i>Salmonella</i> spp. A 11                 | - | - | - |
| <i>Salmonella</i> spp. A 12                 | - | - | - |
| <i>Salmonella</i> spp. A 13                 | - | - | - |
